# Supplementary material
Source: publisher site journal article supplement (https://www.dovepress.com/article/435365)
Supplement: Supplementary file 1 [file get_supplementary_file.php]

Figure S1


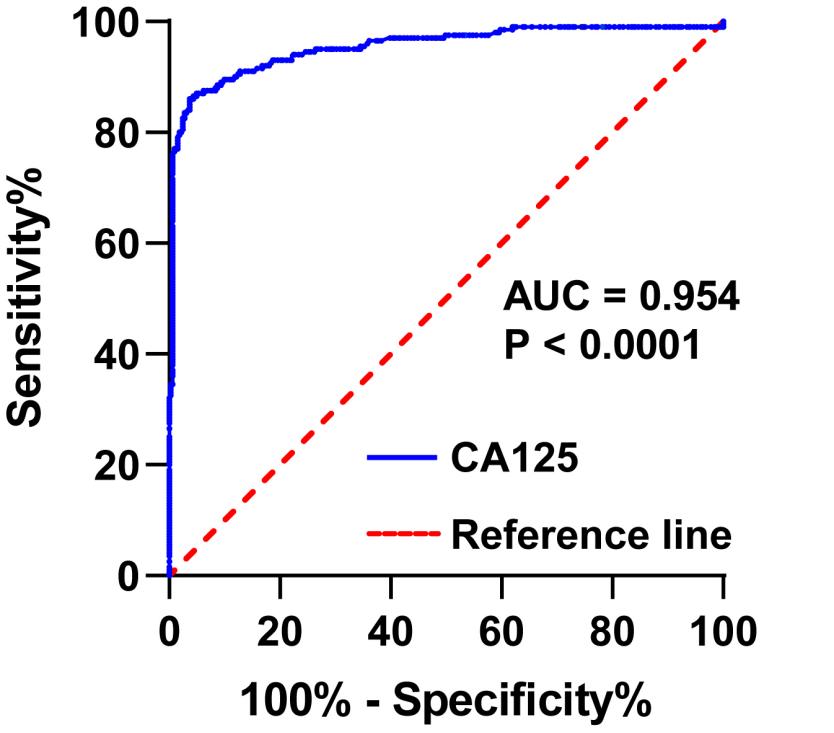


**Figure S1**: **Predictive Value of CA125 in the Diagnosis of Adenomyosis based on the receiver operating characteristic curve**.

Table S1. Comparison of coagulation parameters and characteristics between AM and LM group

| **Covariates** | **Estimates** | **SE** | **Odds Ratio (95% CI)** | **p-Value** |
| --- | --- | --- | --- | --- |
| CA125 | 5.775 | 0.688 | 70.479(30.424-159.924) | <0.001 |
| PLT | 0.002 | 0.003 | 1.002(0.996-1.009) | 0.483 |
| PT | 0.005 | 0.524 | 1.005(0.360-2.807) | 0.993 |
| APTT | -0.357 | 0.116 | 1.695(1.280-2.398) | 0.002 |
| FIB | 0.515 | 0.449 | 1.673(0.694-4.036) | 0.252 |
| TT | 0.504 | 0.188 | 1.655(1.144-2.394) | 0.008 |
| D-dimer | 0.148 | 0.332 | 1.159(0.605-2.222) | 0.656 |
| INR | -0.151 | 4.457 | 0.860(0.000-5349.901) | 0.973 |
| Age | -0.241 | 0.707 | 0.786(0.198-3.121) | 0.732 |
| BMI | -0.978 | 0.581 | 0.376(0.120-1.176) | 0.093 |
| Gravidity | -0.861 | 0.406 | 0.423(0.191-0.936) | 0.054 |
| Abortion | 0.307 | 0.451 | 1.359(0.561-3.291) | 0.497 |
| Hb | -0.416 | 0.679 | 0.659(0.174-2.495) | 0.540 |
| Uterinesize | -0.070 | 0.492 | 0.933(0.356-2.444) | 0.887 |
| CA199 | -0.592 | 0.537 | 0.553(0.193-1.584) | 0.270 |
| Menorrhagia | 1.738 | 0.542 | 5.363(1.544-14.315) | 0.001 |
| Dysmenorrhea | 3.102 | 0.543 | 19.590(6.185-57.347) | <0.001 |

Abbreviations:AM group, patients with adenomyosis; LM group,patients with uterine leiomyoma; Hb, hemoglobin; PLT, platelet count; PT, plasma prothrombin time; APTT, activated partial thromboplastin time; FIB, fibrinogen,TT, thrombin time; FIB, fibrinogen; INR, international normalized ratio; SE, standard erro.

Table S2. Correlation of APTT and TT with Menorrhagia and Dysmenorrhea in Patients with Adenomyosis.

| **Parameters** | **Menorrhagia**  **r value p-value** | **Dysmenorrhea**  **r value p-value** |
| --- | --- | --- |
| APTT (s) | -0.091 0.1667 | 0.0667 0.3483 |
| TT (s) | -0.102 0.1517 | -0.113 0.1096 |

Abbreviations: APTT, activated partial thromboplastin time; TT,thrombin time.

Table S3. Characteristics and coagulation parameters in TB patients

| **Variables/Parameters** | **TB patients**  **（n=16）** |
| --- | --- |
| Age (years) | 46.00 (41.00-48.50) |
| BMI (kg/m2) | 24.73(22.70-27.32) |
| Gravidity | 3 (1-4) |
| Abortion | 1.5 (0-3) |
| Menorrhagia (n, %) | 8 (50.00) |
| Dysmenorrhea (n, %)  Uterine size (cm3) | 10 (62.50)  245 6 204 5  48 5 (45 7-51 2) * <0 001  (174.3-435.2) (173 .2-244.9)* '5( ' 7 2) ' |
| Anemia (n, %) | 7 (43.75) |
| Hb (g/L) | 118.50(77.00-126.25) |
| Uterine size (cm3) | 286.86(129.07-484.11) |
| CA199(U/ml) | 12.92(5.31-31.17) |
| CA125(U/ml) | 78.83 (28.55-202.75) |
| PT(s) | 11.30(10.93-12.08) |
| APTT (s) | 26.65 (24.58-28.08) |
| TT (s) | 17.70 (16.60-18.55) |
| FIB (g/L) | 2.76 (2.31-3.20) |
| D-dimer(mg/L) | 0.55 (0.24-1.58) |
| INR | 0.98 (0.94-1.07) |

Data were expressed as M (P25-75);TB patients, Thrombosis in patients with adenomyosis. Abbreviations: BMI, body mass index; Hb, hemoglobin; PLT, platelet count; PT, plasma prothrombin time; APTT, activated partial thromboplastin time; TT,thrombin time; FIB, fibrinogen; INR, international normalized ratio.
